# Supplementary material for: The HIV-1 latent reservoir is largely sensitive to circulating T cells
Source: eLife. 2020 Oct 6;9:e57246. doi: 10.7554/eLife.57246 (PMC7593086; doi:10.7554/eLife.57246)
Supplement: Supplementary file 1. [file elife-57246-supp1.xlsx]

## Sheet: Sheet1
Supplementary Table 1: Size of the replication competent reservoir as measured by infectious units per million (IUPM) up to 2 years prior to T cell mapping date
PID	Date of Pheresis	IUPM	LowerCI	UpperCI	PGOF
00231	2016-06-22	0.838582	0.507294	1.50639	0.668212
00250	2014-02-25	0.457656	0.259736	0.830423	4.9e-05
00250	2014-01-15	0.325666	0.145877	0.672212	1
00250	2015-03-17	0.171395	0.0611428	0.396369	0.596506
00531	2012-10-09	1.20267	0.719676	2.56108	0.860235
00531	2012-11-06	1.20328	0.753605	2.39676	0.27273
00531	2013-02-19	1.75226	1.0236	4.31204	0.378817
00531	2013-10-09	1.80436	0.950672	4.53928	1
00531	2014-07-23	0.898957	0.559829	1.62926	0.196915
00546	2015-11-17	0.487945	0.25433	0.963393	1
00546	2016-07-12	0.418742	0.20351	0.848347	0.713384
00673	2013-09-11	0.812802	0.445525	1.68158	1
00673	2014-04-01	1.53729	0.898285	3.95969	0.897482
00673	2014-06-03	0.607053	0.353971	1.08279	0.281153
00673	2015-04-07	0.201934	0.0969368	0.376844	4.43e-06
00674	2014-11-12	1.42783	0.78558	3.405	0.423018
00674	2015-01-14	7.2469	3.4986	18.8475	0.710274
00674	2015-03-11	0.496876	0.264669	0.958639	0.402387
00674	2015-06-30	0.333818	0.153101	0.62625	0.0243965
00674	2016-10-25	0.812802	0.445525	1.68158	1
00720	2014-03-04	0.415802	0.202217	0.834053	0.730622
00720	2014-05-06	0.460929	0.251437	0.864313	0.0294491
00720	2014-05-27	0.307144	0.141507	0.60874	0.257918
00720	2014-08-12	0.811499	0.467576	1.58868	0.292045
00728	2014-07-02	1.0322	0.63558	2.00067	1
00728	2015-01-28	0.626772	0.382389	1.09406	0.641275
00728	2015-06-02	0.92499	0.581969	1.66909	0.411302
00728	2015-08-18	0.797763	0.424344	1.60916	0.5537
00728	2016-02-02	0.13079	0.0470571	0.322749	0.509424
00728	2016-06-28	0.543685	0.313191	0.947361	0.362741
00749	2014-07-08	0.341061	0.180628	0.613812	0.507991
00749	2014-08-05	0.389933	0.217144	0.696852	0.599302
00773	2016-11-08	0.233315	0.105006	0.444085	0.781244
00833	2015-07-29	0.0423259	0.00811345	0.147718	0.749871
00834	2015-08-04	0.478601	0.284881	0.825963	0.28806
00848	2015-07-14	0.0217225	0.00120405	0.113819	0.642327
00870	2015-10-27	1.39961	0.787143	3.28827	0.339482
00879	2016-01-05	0.0932911	0.0264613	0.248897	0.0944084
00926	2016-05-24	0.261576	0.134332	0.481419	0.340761
00929	2016-04-26	0.268272	0.156362	0.450843	2.82e-05
00930	2016-07-19	2.0838	1.15695	5.87752	0.531847
00937	2016-06-07	1.53729	0.609594	1.91525	0.791261
00937	2017-02-14	1.01354	0.898285	3.95969	0.897482
00941	2016-06-01	1.5e-08	0	0.0636978	1
01014	2016-11-09	0.338206	0.180135	0.612306	0.0299512
01086	2017-06-06	0.52871	0.304321	0.932807	1
01095	2017-06-14	2.52769	1.378	5.63711	0.106302
10430	2015-04-16	1.88048	0.80218	4.72124	1
10430	2015-11-04	1.01415	0.598808	2.24471	0.437659
10430	2016-03-08	0.938943	0.498663	2.04381	0.629571
10430	2016-08-23	0.917006	0.511778	1.91912	0.87171
10430	2016-11-01	2.08679	1.05204	5.86967	0.528246
20296	2015-04-14	1.5e-08	0	0.0636978	1
