# Supplementary material for: The HIV-1 latent reservoir is largely sensitive to circulating T cells
Source: eLife. 2020 Oct 6;9:e57246. doi: 10.7554/eLife.57246 (PMC7593086; doi:10.7554/eLife.57246)
Supplement: Supplementary file 2. [file elife-57246-supp2.xlsx]

## Sheet: Sheet1
Supplementary Table 2: The number of near full-length sequences obtained from p24 antigen positive wells generated in quantitative viral outgrowth assays for each participant, and the pairwise diversity of sequences obtained (5’ and 3’ halves)
sample: patient ID - sequencing sample - 3 or 5 prime half	sequence#	pi (pairwise diversity)
00231-PH337_3HG	19	0.00021
00231-PH337_5HG	17	0.00026
00250-PH232_3HG	6	0.00048
00250-PH232_5HG	6	0.00122
00250-PH280_3HG	5	0.00076
00250-PH280_5HG	5	0.00119
00250-PH325_3HG	15	0.00059
00250-PH325_5HG	13	0.00107
00531-PH329_3HG	14	0.01508
00531-PH329_5HG	16	0.01104
00546-PH164_3HG	34	0.02606
00546-PH164_5HG	34	0.01659
00546-PH340_3HG	10	0.02894
00546-PH340_5HG	9	0.01735
00674-PH354_3HG	14	0.00663
00674-PH354_5HG	14	0.01053
00720-PH259_3HG	18	0.00383
00720-PH259_5HG	18	0.0033
00720-PH367_3HG	24	0.00347
00720-PH367_5HG	23	0.00299
00728-PH254_3HG	23	0.00121
00728-PH254_5HG	22	0.00071
00728-PH338_3HG	25	0.00144
00728-PH338_5HG	25	0.00083
00728-PH392_3HG	11	0.00156
00728-PH392_5HG	12	0.00103
00749-PH255_3HG	12	0.00065
00749-PH255_5HG	12	0.00026
00749-PH258_3HG	16	0.0011
00749-PH258_5HG	15	0.00043
00749-PH386_3HG	6	0.00164
00749-PH386_5HG	6	0.00067
00749-PH428_3HG	16	0.00241
00749-PH428_5HG	17	0.00099
00773-PH356_3HG	9	0.0006
00773-PH356_5HG	9	0.00013
00833-PH297_3HG	2	0.01561
00833-PH297_5HG	3	0.00661
00834-PH298_3HG	19	0.00438
00834-PH298_5HG	17	0.00262
00834-PH401_3HG	13	0.0045
00834-PH401_5HG	12	0.00227
00848-PH295_3HG	1	NaN
00848-PH295_5HG	1	NaN
00870-PH306_3HG	20	0.03346
00870-PH306_5HG	20	0.01872
00879-PH312_3HG	7	0.01764
00879-PH312_5HG	6	0.01438
00926-PH331_3HG	14	0.00278
00926-PH331_5HG	13	0.00135
00929-PH361_3HG	9	0.00516
00929-PH361_5HG	7	0.00216
00930-PH341_3HG	18	0.01
00930-PH341_5HG	14	0.00519
00937-PH389_3HG	22	0.01919
00937-PH389_5HG	22	0.0164
01014-PH357_3HG	71	0.01285
01014-PH357_5HG	66	0.00706
01086-PH383_3HG	20	0.00389
01086-PH383_5HG	21	0.00158
01095-PH384_3HG	35	0.01324
01095-PH384_5HG	35	0.00984
10430-PH345_3HG	23	0.02944
10430-PH345_5HG	16	0.01658
10430-PH285_3HG	7	0.0209
10430-PH285_5HG	8	0.01644
