# Supplementary material for: The HIV-1 latent reservoir is largely sensitive to circulating T cells
Source: eLife. 2020 Oct 6;9:e57246. doi: 10.7554/eLife.57246 (PMC7593086; doi:10.7554/eLife.57246)
Supplement: Supplementary file 3. [file elife-57246-supp3.xlsx]

## Sheet: clonality
Supplementary Table 3: Percentage of clonal sequences obtained from p24 antigen positive wells generated in quantitative viral outgrowth assays for each participant (5’ and 3’ halves)
	0 base	1 base	2 bases	3 bases
00231-PH337_3HG	0.614	0.7017	0.8771	0.8888
00231-PH337_5HG	0.1838	0.6691	0.9559	1
00250-PH232_3HG	0.2	0.4	0.4667	0.8667
00250-PH232_5HG	0.0667	0.3334	0.4001	0.4001
00250-PH280_3HG	0	0.1	0.2	0.4
00250-PH280_5HG	0	0.1	0.1	0.3
00250-PH325_3HG	0.1524	0.2953	0.3905	0.6667
00250-PH325_5HG	0.141	0.2307	0.3717	0.4614
00531_PH329_3HG	0	0	0	0
00531_PH329_5HG	0.0083	0.0083	0.0083	0.0083
00546-PH164_3HG	0	0	0	0
00546-PH164_5HG	0	0	0	0
00546-PH340_3HG	0	0.0222	0.0222	0.0222
00546-PH340_5HG	0	0	0	0
00674-PH354_3HG	0	0.022	0.033	0.055
00674-PH354_5HG	0.044	0.077	0.099	0.1649
00720-PH259_3HG	0	0.0065	0.0065	0.0065
00720-PH259_5HG	0	0	0.0065	0.0065
00720-PH367_3HG	0.0072	0.0108	0.0108	0.0144
00720-PH367_5HG	0.004	0.004	0.004	0.004
00728-PH254_3HG	0.0237	0.0948	0.2213	0.332
00728-PH254_5HG	0.0909	0.2424	0.4112	0.5887
00728-PH338_3HG	0.0067	0.0134	0.0734	0.1301
00728-PH338_5HG	0.0367	0.21	0.38	0.48
00728-PH392_3HG	0	0	0	0.0182
00728-PH392_5HG	0	0.0606	0.1212	0.2273
00749-PH255_3HG	0.3182	0.4243	0.4395	0.5456
00749-PH255_5HG	0.2273	0.6818	0.9242	1
00749-PH258_3HG	0.0333	0.1833	0.3083	0.4416
00749-PH258_5HG	0.1524	0.4381	0.6476	0.8571
00749-PH386_3HG	0	0.1333	0.2666	0.2666
00749-PH386_5HG	0.2	0.4	0.4	0.6
00749-PH428_3HG	0.0167	0.0417	0.1084	0.1167
00749-PH428_5HG	0.0588	0.1838	0.2867	0.3823
00773-PH356_3HG	0.1667	0.1667	0.4167	0.5834
00773-PH356_5HG	0.4444	0.9444	1	1
00883-PH297_3HG	0	0	0	0
00883-PH297_5HG	0	0	0	0.3333
00834-PH298_3HG	0.0058	0.0175	0.0292	0.0643
00834-PH298_5HG	0.0074	0.0221	0.0221	0.0295
00834-PH401_3HG	0	0.0385	0.0513	0.0641
00834-PH401_5HG	0.0152	0.0152	0.0455	0.1061
00848-PH295_3HG	NaN	NaN	NaN	NaN
00848-PH295_5HG	NaN	NaN	NaN	NaN
00870-PH306_3HG	0	0	0	0
00870-PH306_5HG	0	0	0	0.0053
00879-PH312_3HG	0	0	0	0
00879-PH312_5HG	0	0	0	0
00926-PH331_3HG	0	0	0.022	0.022
00926-PH331_5HG	0	0.0513	0.1667	0.3334
00929-PH361_3HG	0.0278	0.0278	0.0278	0.0278
00929-PH361_5HG	0	0	0	0.0476
00930-PH341_3HG	0	0	0	0
00930-PH341_5HG	0.011	0.011	0.011	0.011
00937-PH389_3HG	0.0043	0.0043	0.0043	0.0043
00937-PH389_5HG	0.0043	0.0043	0.0043	0.013
01014-PH357_3HG	0.1807	0.192	0.2129	0.2133
01014-PH357_5HG	0.1814	0.1917	0.1917	0.1945
01086-PH383_3HG	0.0316	0.1421	0.2158	0.2421
01086-PH383_5HG	0.1333	0.2857	0.3524	0.3714
01095-PH384_3HG	0.005	0.005	0.005	0.005
01095-PH384_5HG	0.0034	0.0051	0.0051	0.0051
10430-PH285_3HG	0	0	0	0
10430-PH285_5HG	0	0	0	0
10430-PH345_3HG	0.0119	0.0119	0.0119	0.0119
10430-PH345_5HG	0.0083	0.0083	0.0083	0.0083
longitudinal-00250_3HG	0.1662	0.3293	0.4862	0.7662
longitudinal-00250_5HG	0.1268	0.2464	0.3261	0.4167
longitudinal-00546_3HG	0.0011	0.0032	0.0032	0.0032
longitudinal-00546_5HG	0	0.0011	0.0011	0.0011
longitudinal-00720_3HG	0.0023	0.0035	0.0047	0.0059
longitudinal-00720_5HG	0.0012	0.0049	0.0049	0.0073
longitudinal-00728_3HG	0.0094	0.0334	0.0965	0.1824
longitudinal-00728_5HG	0.0462	0.1847	0.3232	0.4693
longitudinal-00749_3HG	0.0998	0.262	0.3529	0.4295
longitudinal-00749_5HG	0.2008	0.5133	0.7065	0.8542
longitudinal-00834_3HG	0.0081	0.0283	0.0444	0.0726
longitudinal-00834_5HG	0.0172	0.0246	0.0345	0.0641
longitudindal - 10430-3HG	0.0069	0.0069	0.0069	0.0069
longitudindal - 10430-5HG	0.0036	0.0036	0.0036	0.0036
