# Supplementary material for: The HIV-1 latent reservoir is largely sensitive to circulating T cells
Source: eLife. 2020 Oct 6;9:e57246. doi: 10.7554/eLife.57246 (PMC7593086; doi:10.7554/eLife.57246)
Supplement: Supplementary file 5. [file elife-57246-supp5.xlsx]

## Sheet: Sheet1
Supplementary Table 5: Summary of reactive T cell epitopes
PID	Peptide	Sequence	Magnitude (SFU/10^6 PBMCs	Genome		Escape	Optimal	Entropy calculated from LANL database, all based on 18mer sequence unless optimal found.
	clabe b tested at 10ug/ml, stripes tested at 10um/ml					0=no escape variant, 1=escape variant		# of background sequences	clade	Highest random entropy	Date Searched
231	clade b	LITPKKIKPPLPSVTKLT	742.5	genome:5497→5550	Vif153→170	1		1453	B	0.483056	2017-06-19
231	clade b	HTGERDWHLGQGVSIEWR	436.667	genome:5257→5310	Vif73→90	0		1453	B	0.180833	2017-06-19
231	clade b	FFREDLAFPQGKAREFSS	352.5	genome:2085→2138	Pol1→18	0		931	B	0.412722	2017-06-19
231	clade b	CVPTDPNPQEVVLENVTE	352.5	genome:6444→6497	Env74→91	0	DPNPQEVVL	1936	B	0.503889	2019-07-09
231	clade b	GPQREPYNEWTLELLEEL	260.833	genome:5583→5636	Vpr9→26	1		1427	B	0.264833	2017-06-19
231	clade b	LGLNKIVRMYSPTSILDI	187.5	genome:1591→1644	Gag268→285	1		1536	B	0.1345	2017-06-19
231	clade b	PFRDYVDRFYKTLRAEQA	150.833	genome:1663→1716	Gag292→309	0		1536	B	0.0556667	2017-06-19
231	clade b	EVGFPVRPQVPLRPMTYK	147.5	genome:8989→9042	Nef65→82	0		1819	B	0.1745	2017-06-19
231	clade b	QNPDIVIYQYMDDLYVGS	70.8333	genome:3069→3122	Pol329→346	0		931	B	0.185278	2017-06-19
231	clade b	HIVWASRELERFAVNPGL	55	genome:886→939	Gag33→50	0		1536	B	0.158556	2017-06-19
231	clade b	FSPEVIPMFSALSEGATP	40.8333	genome:1279→1332	Gag164→181	0		1536	B	0.118056	2017-06-19
231	clade b	KTGKYARMRGAHTNDVKQ	37.5	genome:3597→3650	Pol505→522	0		931	B	0.222667	2017-06-19
231	clade b	WDRLHPVHAGPIAPGQMR	20.8333	genome:1423→1476	Gag212→229	0		1536	B	0.246167	2017-06-19
250	clade b	LFSYHRLRDLLLIVTRIV	727.083	genome:8517→8570	Env765→782	1		1839	B	0.425444	2017-06-21
250	clade b	EIYKRWIILGLNKIVRMY	188.75	genome:1567→1620	Gag260→277	1		1536	B	0.116389	2017-06-21
250	clade b	TVKCFNCGKEGHIAKNCR	118.75	genome:1954→2007	Gag389→406	0	CGKEGHIAK	1621	B	0.301	2019-07-09
250	clade b	HCQVCFITKGLGISYGRK	90.4167	genome:5927→5980	Tat33→50	0		1005	B	0.297333	2017-06-21
250	clade b	LERFAVNPGLLETSEGCR	35.8333	genome:910→963	Gag41→58	0		1536	B	0.242778	2017-06-21
250	clade b	FYKTLRAEQASQEVKNWM	26.6667	genome:1687→1740	Gag300→317	0		1536	B	0.131722	2017-06-21
250	clade b	TDIQTKELQKQITKIQNF	20	genome:4845→4898	Pol921→938	1	QTKELQKQI	979	B	0.176111	2019-07-15
250	clade b	MREPRGSDIAGTTSTLQE	17.5	genome:1471→1524	Gag228→245	0		1536	B	0.126278	2017-06-21
250	Stripes	ASDAKAYeTEVHNVWATH	286.875	genome:6387→6440	Env55→72	1		1936	B	0.314833	2019-04-15
250	Stripes	TVLEDINLPGRWKPKMIG	19.375	genome:2343→2396	Pol87→104	0		979	B	0.274333	2019-04-15
531	clade b	GHKARVLAEAMSQVTNSA	390.417	genome:1858→1911	Gag357→374	1	VLAEAMSQV	1621	B	0.247556	2019-07-15
546	clade b	EIYKRWIILGLNKIVRMY	568.333	genome:1567→1620	Gag260→277	0		1536	B	0.116389	2017-06-20
546	clade b	EKIRLRPGGKKKYKLKHI	248.333	genome:838→891	Gag17→34	1	RLRPGGKKKY	1621	B	0.2391	2019-07-15
546	clade b	LTFGWCFKLVPVEPEKVE	55	genome:9205→9258	Nef137→154	0	LTFGWCFKL	1887	B	0.144111	2019-07-15
546	clade b	PAKLLWKGEGAVVIQDNS	23.3333	genome:4941→4994	Pol953→970	0		931	B	0.0905556	2017-06-20
673	clade b	QVPLRPMTYKGALDLSHF	790	genome:9013→9066	Nef73→90	0		1626	B	0.294111	2017-03-23
673	clade b	VKTIHTDNGSNFTSTTVK	740	genome:4557→4610	Pol825→842	1		772	B	0.356722	2017-03-23
673	clade b	LTFGWCFKLVPVEPEKVE	600	genome:9205→9258	Nef137→154	1		1626	B	0.569444	2017-03-23
673	clade b	KEGHIAKNCRAPRKKGCW	103	genome:1978→2031	Gag397→414	0		1340	B	0.244944	2017-03-23
673	clade b	NLLQYWSQELKNSAVSLL	80	genome:8616→8669	Env798→815	1		1562	B	0.326333	2017-03-23
674	clade b	RAILHIPRRIRQGLERAL	445.417	genome:8736→8789	Env838→855	1	IPrRIRQGL	1936	B	0.319111	2019-07-15
674	clade b	HFLKEKGGLEGLIYSQKR	307.917	genome:9061→9114	Nef89→106	1	KEKGGLeGL	1887		0.227333	2019-07-15
674	clade b	AIFQSSMTKILEPFRKQN	294.583	genome:3021→3074	Pol313→330	0		772	B	0.182833	2017-03-23
674	clade b	GPQREPYNEWTLELLEEL	206.25	genome:5583→5636	Vpr9→26	0		701	B	0.3005	2017-03-23
674	clade b	EVGFPVRPQVPLRPMTYK	104.583	genome:8989→9042	Nef65→82	1		1626	B	0.181222	2017-03-23
674	clade b	QGQWTYQIYQEPFKNLKT	19.1667	genome:3549→3602	Pol489→506	0		772	B	0.220389	2017-03-23
674	clade b	TPQDLNTMLNTVGGHQAA	15.8333	genome:1327→1380	Gag180→197	0		1340	B	0.0690556	2017-03-22
720	clade b	KQLTEAVQKIATESIVIW	807.917	genome:3645→3698	Pol521→538	1	IATESIVIW	979	B	0.358667	2019-07-15
720	clade b	RAILHIPRRIRQGLERAL	185.417	genome:8736→8789	Env838→855	0	IPRRIRQGFA	1936	B	0.2982	2019-07-15
720	clade b	QNPDIVIYQYMDDLYVGS	174.167	genome:3069→3122	Pol329→346	1		931	B	0.185278	2017-06-20
720	clade b	QVPLRPMTYKGALDLSHF	165	genome:9013→9066	Nef73→90	0		1819	B	0.2785	2017-06-20
720	clade b	ELKNEAVRHFPRIWLHGL	62.0833	genome:5631→5684	Vpr25→42	0	FPRIWLHSL	1476	B	0.469	2019-07-15
720	clade b	NTSVITQACPKVSFEPIP	42.5	genome:6813→6866	Env197→214	0		1839	B	0.2755	2017-06-20
720	clade b	TENFNMWKNNMVEQMHED	31.25	genome:6492→6545	Env90→107	1		1839	B	0.286889	2017-06-20
720	clade b	IVFNQSSGGDPEIVMHSF	29.5833	genome:7299→7352	Env359→376	1	DPEIIMYTF	1936	B	0.497111	2019-07-15
720	clade b	GPQREPYNEWTLELLEEL	28.75	genome:5583→5636	Vpr9→26	0		1427	B	0.264833	2017-06-20
720	clade b	MICSAAEKLWVTVYYGVP	27.0833	genome:6300→6353	Env26→43	0		1839	B	0.618833	2017-06-20
720	clade b	VPVWKEATTTLFCASDAK	25.4167	genome:6348→6401	Env42→59	1		1839	B	0.184389	2017-06-20
720	clade b	IVFIEYRKILRQRKIDRL	25.4167	genome:6134→6187	Vpu25→42	1		1540	B	0.404722	2017-06-20
720	clade b	ESPAVLESGTKE	20.4167	genome:8615→8650	Rev105→116	1		1085	B	0.497583	2018-06-03
720	clade b	SINNETPGIRYQYNVLPQ	17.9167	genome:2949→3002	Pol289→306	0		931	B	0.132333	2017-06-20
720	clade b	QGTVSFSFPQITLWQRPL	13.3333	genome:2229→2282	Pol49→66	0	LSFPQITLW	979	B	0.314556	2019-07-15
720	stripe	NNTLKhIVEKLRKQYGS	20	genome:7239→7289	Env339→355	1		1936	B	1.72518	2019-04-15
720	stripe	LERHGAVTSSNTAANNA	154.167	genome:8905→8955	Nef37→53	0		1887	B	0.894	2019-04-15
720	stripe	IINRWQEVGKAMYAPPI	116.667	genome:7491→7541	Env423→439	0		1936	B	0.291353	2019-04-15
728	clade b	TINEEAAEWDRLHPVHAG	123.333	genome:1399→1452	Gag204→221	0		1536	B	0.159833	2017-06-19
728	clade b	GIGGYSAGERIVDIIATD	118.333	genome:4797→4850	Pol905→922	0		931	B	0.176111	2017-06-19
728	clade b	EREVLVWKFDSRLAFHHM	71.6667	genome:9325→9378	Nef177→194	0		1819	B	0.462611	2017-06-19
728	clade b	EKIRLRPGGKKKYKLKHI	67.5	genome:838→891	Gag17→34	0		1536	B	0.263333	2017-06-19
728	clade b	HFLKEKGGLEGLIYSQKR	22.5	genome:9061→9114	Nef89→106	0		1819	B	0.317889	2017-06-19
728	clade b	KYTAFTIPSINNETPGIR	22.08	genome:2925→2978	Pol281→298	0		931	B	0.133889	2017-06-19
728	clade b	RERMRRAEPAADGVGAVS	13.3333	genome:8845→8898	Nef17→34	0		1887	B	0.842111	2018-06-03
749	clade b	IAEIQKQGQGQWTYQIYQ	123.75	genome:3525→3578	Pol481→498	0		979	B	0.258056	2018-06-02
749	clade b	NSDIKVVPRRKAKIIRDY	118.75	genome:4989→5042	Pol969→986	0		979	B	0.134611	2018-06-02
749	clade b	QKQITKIQNFRVYYRDSR	108.75	genome:4869→4922	Pol929→946	1	SKIQNFRVYY	979		0.1917	2019-07-15
749	clade b	IHNFKRKGGIGGYSAGER	26.25	genome:4773→4826	Pol897→914	0		979	B	0.0876667	2018-06-02
749	clade b	IVQLNESVEINCTRPNNN	22.9167	genome:7077→7130	Env285→302	1	ETIEINCTR	1936	B	0.775778	2019-07-15
749	clade b	RKAKGWFYRHHYESTHPR	17.9167	genome:5137→5190	Vif33→50	1	SKKCKGWFY	1505	B	0.658889	2019-07-15
773	clade b	VPLDKDFRKYTAFTIPSI	843.75	genome:2901→2954	Pol273→290	0		931	B	0.222222	2017-06-20
773	clade b	ELKNEAVRHFPRIWLHGL	274.583	genome:5631→5684	Vpr25→42	0		1427	B	0.378	2017-06-20
773	clade b	EELRSLYNTVATLYCVHQ	55.4167	genome:1006→1059	Gag73→90	0		1536	B	0.319556	2017-06-20
833	clade b	FSPEVIPMFSALSEGATP	259.167	genome:1279→1332	Gag164→181	0		1536	B	0.118056	2017-06-21
833	clade b	WMTETLLVQNANPDCKTI	27.5	genome:1735→1788	Gag316→333	0		1536	B	0.0756667	2017-06-21
833	clade b	WLEAQEEEEVGFPVRPQV	24.1667	genome:8965→9018	Nef57→74	0		1819	B	0.429	2017-06-21
833	clade b	KELYPLASLRSLFGNDPS	22.5	genome:2230→2283	Gag481→498	0		1536	B	0.405111	2017-06-21
834	clade b	VPLDKDFRKYTAFTIPSI	570	genome:2901→2954	Pol273→290	0		979	B	0.223333	2018-06-02
834	clade b	VEAIIRILQQLLFIHFRI	76.6667	VPR- cannot align	Vpr57-74	0		not recognized by LANL			2019-07-15
834	clade b	IAGTTSTLQEQIGWMTNN	51.6667	genome:1495→1548	Gag236→253	1	TStLQEQINW	1621	B	0.1903	2019-07-15
834	clade b	QKQITKIQNFRVYYRDSR	26.6667	genome:4869→4922	Pol929→946	1	KIQNFRVYY	979	B	0.156111	2019-07-15
848	clade b	HFLKEKGGLEGLIYSQKR	154.583	genome:9061→9114	Nef89→106	0		1887	B	0.334889	2018-06-02
848	clade b	QKQITKIQNFRVYYRDSR	78.75	genome:4869→4922	Pol929→946	0		979	B	0.182444	2018-06-02
848	clade b	WEVLKYWWNLLQYWSQEL	42.9167	genome:8592→8645	Env790→807	0		1927	B	0.350722	2018-06-02
870	clade b	EVGFPVRPQVPLRPMTYK	155	genome:8989→9042	Nef65→82	0		1819	B	0.1745	2017-06-19
870	clade b	IRYQYNVLPQGWKGSPAI	65.8333	genome:2973→3026	Pol297→314	0		931	B	0.0523889	2017-06-19
870	clade b	YKGALDLSHFLKEKGGLE	46.6667	genome:9037→9090	Nef81→98	0		1819	B	0.326556	2017-06-19
870	clade b	KILEPFRKQNPDIVIYQY	45.8333	genome:3045→3098	Pol321→338	0		931	B	0.232667	2017-06-19
870	clade b	RKKRRQRRRAPQDSQTHQ	26.6	genome:5975→6028	Tat49→66	0		1005	B	0.600778	2017-06-19
870	clade b	KKKSVTVLDVGDAYFSVP	23.3333	genome:2853→2906	Pol257→274	0		931	B	0.108333	2017-06-19
879	clade b	PFRDYVDRFYKTLRAEQA	418.333	genome:1663→1716	Gag292→309	0		1621	B	0.0559444	2018-06-02
879	clade b	EKIRLRPGGKKKYKLKHI	30.8333	genome:838→891	Gag17→34	0		1621	B	0.278056	2018-06-02
879	clade b	LERFAVNPGLLETSEGCR	20.8333	genome:910→963	Gag41→58	0		1621	B	0.246722	2018-06-02
879	clade b	NLLQYWSQELKNSAVSLL	17.0833	genome:8616→8669	Env798→815	1		1936	B	0.327556	2018-06-02
879	clade b	WDRLHPVHAGPIAPGQMR	12.5	genome:1423→1476	Gag212→229	0		1621	B	0.247722	2018-06-02
926	clade b	TPQDLNTMLNTVGGHQAA	80.4167	genome:1327→1380	Gag180→197	0	TPQDLNTML	1621	B	0.0626667	2019-07-15
926	clade b	KQLTEAVQKIATESIVIW	36.25	genome:3645→3698	Pol521→538	0		979	B	0.263444	2018-06-02
926	clade b	LGLNKIVRMYSPTSILDI	32.0833	genome:1591→1644	Gag268→285	0		1621	B	0.136556	2018-06-02
926	clade b	WRKKRYSTQVDPDLADQL	31.25	genome:5305→5358	Vif89→106	0		1505	B	0.457278	2018-06-02
926	clade b	VKHHMYISRKAKGWFYRH	22.9167	genome:5113→5166	Vif25→42	0		1505	B	0.549833	2018-06-02
926	clade b	QEQIGWMTNNPPIPVGEI	15.4167	genome:1519→1572	Gag244→261	0		1621	B	0.216944	2018-06-02
926	clade b	PTAPPEESFRFGEETTTP	15.4167	genome:2152→2205	Gag455→472	0	TAPPAESGF	1621	B	0.294444	2019-07-15
929	clade b	TPQDLNTMLNTVGGHQAA	337.5	genome:1327→1380	Gag180→197	0		1340	B	0.0690556	2017-03-22
929	clade b	NSDIKVVPRRKAKIIRDY	33.3333	genome:4989→5042	Pol969→986	1	RKAKIIRNY	979	B	0.131222	2019-07-15
929	clade b	GRPAEPVPLQLPPLERLT	13.3333	genome:8495→8548	Rev65→82	0		836	B	0.392611	2017-03-23
929	stripe	DLRNLCLFSYHRLRDLL	135.208	genome:8499→8549	Env759→775	1		1936	B	0.291353	2019-04-15
929	stripe	GPGTRFPLTFGWCFKLV	45.2083	genome:9184→9234	Nef130→146	0		1887	B	0.212118	2019-04-15
929	stripe	HIYLGRSAEPVPLhLPPLER	154.375	genome:8483→8542	Rev61→80	0		1085	B	0.53905	2019-04-15
929	stripe	VRHFPRPWLHgLGQYIYETY	79.375	genome:5649→5708	Vpr31→50	0		1476	B	0.34075	2019-04-15
930	clade b	YKGALDLSHFLKEKGGLE	336.667	genome:9037→9090	Nef81→98	1		1819	B	0.326556	2017-06-20
930	clade b	NNPPIPVGEIYKRWIILG	308.333	genome:1543→1596	Gag252→269	0		1536	B	0.204444	2017-06-20
930	clade b	EVGFPVRPQVPLRPMTYK	241.667	genome:8989→9042	Nef65→82	0		1819	B	0.1745	2017-06-20
930	clade b	LVPVEPEKVEEANEGENN	215	genome:9229→9282	Nef145→162	0		1819	B	0.772222	2017-06-20
930	clade b	FDSRLAFHHMARELHPEY	211.667	genome:9349→9402	Nef185→202	1		1819	B	0.418111	2017-06-20
930	clade b	KLVSAGIRKVLFLDGIDK	160	genome:4197→4250	Pol705→722	0		931	B	0.208278	2017-06-20
930	clade b	HRTKIEELRQHLLRWGFT	95	genome:3141→3194	Pol353→370	0		931	B	0.325	2017-06-20
930	clade b	KRQDILDLWVYHTQGYFP	80	genome:9109→9162	Nef105→122	1		1819	B	0.259222	2017-06-20
930	clade b	GPQREPYNEWTLELLEEL	71.6667	genome:5583→5636	Vpr9→26	1		1427	B	0.264833	2017-06-20
930	clade b	QASQEVKNWMTETLLVQN	65	genome:1711→1764	Gag308→325	0		1536	B	0.118167	2017-06-20
930	clade b	EKIRLRPGGKKKYKLKHI	58.3333	genome:838→891	Gag17→34	0		1536	B	0.263333	2017-06-20
930	clade b	VKTIHTDNGSNFTSTTVK	58.3333	genome:4557→4610	Pol825→842	1		931	B	0.354	2017-06-20
930	clade b	TKALTEVIPLTEEAELEL	56.6667	genome:3405→3458	Pol441→458	0		931	B	0.288944	2017-06-20
930	clade b	AIFQSSMTKILEPFRKQN	53.3333	genome:3021→3074	Pol313→330	0		931	B	0.192722	2017-06-20
930	clade b	KAGYVTDRGRQKVVSLTD	48.3333	genome:3909→3962	Pol609→626	1		931	B	0.312611	2017-06-20
930	clade b	AEAMSQVTNSATIMMQRG	38.3333	genome:1879→1932	Gag364→381	1		1536	B	0.856056	2017-06-20
930	clade b	RIRQGLERALL	36.6667	genome:8760→8792	Env846→856	0		1936	B	0.323727	2018-06-03
930	clade b	LNFPISPIETVPVKLKPG	23.3333	genome:2541→2594	Pol153→170	0		931	B	0.0806667	2017-06-20
930	clade b	RERMRRAEPAADGVGAVS	23.3333	genome:8845→8898	Nef17→34	0		1819	B	0.839111	2017-06-20
937	clade b	KKKSVTVLDVGDAYFSVP	129.583	genome:2853→2906	Pol257→274	0		979	B	0.111889	2018-06-02
937	clade b	PGPGIRYPLTFGWCFKLV	75.4167	genome:9181→9234	Nef129→146	0		1887	B	0.216889	2018-06-02
937	clade b	HMARELHPEYYKDC	42.9167	genome:9373→9414	Nef193→206	1		1887	B	0.760786	2018-06-02
937	clade b	IKKEKVYLAWVPAHKGIG	28.75	genome:4125→4178	Pol681→698	1		979	B	0.121111	2018-06-02
937	clade b	KGLGISYGRKKRRQRRRA	20.4167	genome:5951→6004	Tat41→58	1	SYGRKKRRQ	1095	B	0.220333	2019-07-15
941	clade b	YKGALDLSHFLKEKGGLE	281.25	genome:9037→9090	Nef81→98	no outgrowth virus		1887	B	0.334444	2018-06-03
941	clade b	VEEANEGENNSLLHPMSL	261.25	genome:9253→9306	Nef153→170	no outgrowth virus		1887	B	0.643444	2018-06-03
941	clade b	KKVERETETDPVD	256.25	genome:8428→8466	Tat89→101	no outgrowth virus		1095	B	0.911769	2018-06-03
941	clade b	FPDWQNYTPGPGIRYPLT	253.75	genome:9157→9210	Nef121→138	no outgrowth virus		1887	B	0.232056	2018-06-03
941	clade b	HQVSLSKQPASQPRGDPT	249.583	genome:6023→6045,8379→8409	Tat65→82	no outgrowth virus		1002	B	0.689111	2018-06-03
941	clade b	RGPDRPEGIEEEGGERDR	245.417	genome:8397→8450	Env725→742	no outgrowth virus		1936	B	0.390556	2018-06-03
941	clade b	KRQDILDLWVYHTQGYFP	217.083	genome:9109→9162	Nef105→122	no outgrowth virus		1887	B	0.264556	2018-06-03
941	clade b	LLNATAIAVAEGTDRVIE	185.417	genome:8664→8717	Env814→831	no outgrowth virus		1936	B	0.3725	2018-06-03
941	clade b	EIYKRWIILGLNKIVRMY	164.583	genome:1567→1620	Gag260→277	no outgrowth virus		1621	B	0.115389	2018-06-03
941	clade b	SVVGWPTVRERMRRAEPA	66.25	genome:8821→8874	Nef9→26	no outgrowth virus		1887	B	1.63339	2018-06-03
941	clade b	TVKCFNCGKEGHIAKNCR	35.4167	genome:1954→2007	Gag389→406	no outgrowth virus		1621	B	0.322111	2018-06-03
1014	clade b	EVGFPVRPQVPLRPMTYK	757.083	genome:8989→9042	Nef65→82	0		1819	B	0.1745	2018-04-05
1014	clade b	RAILHIPRRIRQGLERAL	324.583	genome:8736→8789	Env838→855	0		1839	B	0.415833	2018-04-05
1014	clade b	HFLKEKGGLEGLIYSQKR	127.083	genome:9061→9114	Nef89→106	1		1819	B	0.317889	2018-04-05
1014	clade b	TAVQMAVFIHNFKRKGGI	47.9167	genome:4749→4802	Pol889→906	0		931	B	0.0826667	2018-04-05
1014	clade b	PGHKARVLAEAMSQVTNS	42.9167	genome:1855→1908	Gag356→373	0		1536	B	0.974111	2018-04-05
1014	clade b	PGPGIRYPLTFGWCFKLV	41.25	genome:9181→9234	Nef129→146	1		1819	B	0.215667	2018-04-05
1014	clade b	AKRRVVQREKRAVGIGAM	30.4167	genome:7725→7778	Env501→518	1		1839	B	0.826833	2018-04-05
1014	stripe	EVIPAETGQETAYFiLK	72.9167	genome:4488→4538	Pol802→818	1		979	B	0.137471	2019-04-15
1014	stripe	RWPVTTvHTDNGSNFTS	18.75	genome:4548→4598	Pol822→838	0		979	B	0.228412	2019-04-15
1086	clade b	EKIRLRPGGKKKYKLKHI	183.333	genome:838→891	Gag17→34	1	RLRPGGKKk	1621	B	0.261667	2019-07-15
1086	clade b	EIYKRWIILGLNKIVRMY	60	genome:1567→1620	Gag260→277	0		1621	B	0.115389	2018-06-02
1086	clade b	MREPRGSDIAGTTSTLQE	14.1667	genome:1471→1524	Gag228→245	0		1621	B	0.123611	2018-06-02
1095	clade b	AIFQSSMTKILEPFRKQN	1390.42	genome:3021→3074	Pol313→330	0	AIFQSSMtK	979	B	0.201222	2019-07-15
1095	clade b	VPLDKDFRKYTAFTIPSI	656.25	genome:2901→2954	Pol273→290	0		979	B	0.223333	2018-06-02
1095	clade b	KEGHIAKNCRAPRKKGCW	245.417	genome:1978→2031	Gag397→414	1		1621	B	0.240611	2018-06-02
1095	clade b	HRTKIEELRQHLLRWGFT	44.5833	genome:3141→3194	Pol353→370	1		979	B	0.325389	2018-06-02
10430	clade b	LEGLIYSQKRQDILDLWV	156.667	genome:9085→9138	Nef97→114	1	RqeILDLWV	1887	B	0.229333	2019-07-15
20296	clade b	TINEEAAEWDRLHPVHAG	142.5	genome:1399→1452	Gag204→221	no outgrowth virus		1340	B	0.154889	2017-03-24
20296	clade b	LGLNKIVRMYSPTSILDI	69.25	genome:1591→1644	Gag268→285	no outgrowth virus		1340	B	0.137667	2017-03-24
20296	clade b	EWTLELLEELKNEAVRHF	64.25	genome:5607→5660	Vpr17→34	no outgrowth virus		701	B	0.263333	2017-03-24
20296	clade b	FSPEVIPMFSALSEGATP	55	genome:1279→1332	Gag164→181	no outgrowth virus		1340	B	0.124389	2017-03-24
