# Supplementary material for: The HIV-1 latent reservoir is largely sensitive to circulating T cells
Source: eLife. 2020 Oct 6;9:e57246. doi: 10.7554/eLife.57246 (PMC7593086; doi:10.7554/eLife.57246)
Supplement: Supplementary file 6. [file elife-57246-supp6.xlsx]

## Sheet: Sheet1
Supplementary Table 6: Raw data from studies evaluating viral T cell escape variants in the replication competent reservoir
PID	cells used per well	Clade B = 18mer from Clade B consensus peptide; Variant = outgrowth sequence	sequence	Magnitude to individual peptide(10^6),>4x mock, 10um	SEM (assays done in triplicate)	Notes	Escape (1=yes 0=no)	Total # of seq across all timepoints	Total Freq across all timepoints
231	200000	Clade B	LITPKKIKPPLPSVTKLT	1647.5	0.333333	escape	1	N/A	0
231	200000	Variant	LIAPKKKKPPLPSVRKLT	2.5	0.333333			19	1
231	200000	Clade B	HTGERDWHLGQGVSIEWR	315.833	1.53	no escape	0	N/A	0
231	200000	Variant	HTGEKDWQLGHGVSIEWR	374.167	0.67			19	1
231	200000	Clade B	FFREDLAFPQGKAREFSS	734.167	1.86	no escape	0	N/A	0
231	200000	Variant	FFRENLAFPQGKAREFSS	1010.83	1.53			19	1
231	400000	Clade B	CVPTDPNPQEVVLENVTE	481.667	0.333333	no escape	0	N/A	0
231	400000	variant	CVPTDPNPQEVVLGNVTE	454.167	2.90593			18	0.947368
231	400000	variant	CVPTDPNPQEVILGNVTE	471.667	4.40959			1	0.0526316
231	400000	optimal variant	DPNPQEVVL	529.167	5.4569	optimal		18	0.947368
231	400000	optimal variant	DPNPQEVIL	521.667	4.33333			1	0.0526316
231	200000	Clade B	GPQREPYNEWTLELLEEL	682.5	2.4	escape	1	N/A	0
231	200000	Variant	GPQREPANEWTLELLEEL	2310.83	2.65			19	1
231	200000	Clade B	LGLNKIVRMYSPTSILDI	35.8333	0.58	escape	1	N/A	0
231	200000	Variant	LGLNKIVRMYSPVSILDI	610.833	1.73			19	1
231	400000	variant/ Clade B	EVGFPVRPQVPLRPMTYK	355	2.33333	no escape	0	18	0.947368
231	400000	variant	EVGFPVRPQIPLRPMTYK	313.333	0			1	0.0526316
231	200000	Clade B	KTGKYARMRGAHTNDVKQ	74.1667	0.88	no escape	0	N/A	0
231	200000	Variant	RTGKYARMRGAHTNDVKQ	75.8333	0.58			19	1
231	200000	Clade B	WDRLHPVHAGPIAPGQMR	20.8333	1	no escape	0	N/A	0
231	200000	Variant	WDRMHPVQAGPIAPGQLR	22.5	0.33			19	1
250	400000	Clade B	LFSYHRLRDLLLIVTRIV	780.208	1.66667	escape	1	N/A	0
250	400000	new variant	IFLYHRLRDLLLIVTRIV	773.542	1.66667			25	0.961538
250	400000	new variant	IFLYHRLRDLLLIVTQIV	77.7083	0.666667			1	0.0384615
250	400000	optimal	RDLLLIVTR	30.2083	0.666667			25	0.961538
250	400000	optimal	RDLLLIVQR	71.875	1			1	0.0384615
250	400000	new variant	EIYKRWIVMGLNKIVRMY	1933.54	2.18581	escape	1	24	0.96
250	400000	variant/ Clade B	EIYKRWIILGLNKIVRMY	414.375	0.57735			1	0.04
250	400000	variant optimal	RWIVMGLNK	1711.88	9.81495			24	0.96
250	400000	variant optimal	RWIILGLNK	103.542	0.881917			1	0.04
250	400000	Clade B	TVKCFNCGKEGHIAKNCR	306.042	1.76383	no escape	0	N/A	0
250	400000	variant	VVKCFNCGKEGHIAKNCR	278.542	0.666667			24	0.96
250	400000	variant	TIKCFNCGKEGHIARNCR	259.375	0.57735			1	0.04
250	400000	variant optimal	CGKEGHIAK	355.208	3.1798	optimal		24	0.96
250	400000	variant optimal	CGKEGHIAR	323.542	2.96273			1	0.04
250	400000	Clade B	HCQVCFITKGLGISYGRK	57.9167	1	no escape	0	N/A	0
250	400000	Variant	HCQKCFTTKGLGISYGRK	49.5833	1.67			25	1
250	400000	variant/ Clade B	LERFAVNPGLLETSEGCR	136.042	0.881917	no escape	0	24	0.96
250	400000	variant	LERFAVNPGLLETSEGCK	141.875	0.57735			1	0.04
250	400000	variant opitmal	LLETSEGCR	68.5417	0.666667			24	0.96
250	400000	variant optimal	LLETSEGCK	18.5417	0.333333			1	0.04
250	400000	new variant	SDLQTKELQKQITKIQNF	21.0417	0.881917	escape	1	24	0.96
250	400000	Clade B/variant	TDIQTKELQKQITKIQNF	9.375	0	optimal		1	0.04
250	400000	variant optimal	QTKELQKQI	25.2083	0.333333			25	1
250	400000	variant optimal	ELQKQI	8.54167	0.333333			25	1
250	400000	Stripes	ASDAKAYeTEVHNVWATH	286.875	0.57735	escape	1	14	0.538462
250	400000	Stripes	ASDAKAYGTEVHNVWATH	26.875	0.57735			12	0.461538
250	400000	Stripes	TVLEDIDLPGRWKPKMIG	16.0417	0.333333	no escape	0	15	0.6
250	400000	Stripes	TVLEDINLPGRWKPKMIG	19.375	0.57735			10	0.4
531	400000	Clade B	GHKARVLAEAMSQVTNSA	514.167	1.76383	escape	1	N/A
531	400000	variant	GHKARVLAEAMSQVTnPP	199.167	2.02759			13	0.8125
531	400000	variant	GHKARVLAEAMSQVTSPP	99.1667	2.02759			3	0.1875
531	400000	variant optimal	VLAEAMSQV	570.833	2.51661	optimal		16	1
531	400000	variant optimal	VLAEAMSQVT	477.5	2.66667			16	1
531	400000	variant optimal	AEAMSQVTNP	4.16667	0.881917			13	0.8125
531	400000	variant optimal	AEAMSQVTSP	-2.5	0.881917			3	0.1875
531	400000	optimal clade B	AEAMSQVTNS	-5	0.666667			N/A
546	400000	Clade B/ variant	EKIRLRPGGKKKYkLKHi	173.333	0	escape	1	34	0.790698
546	400000	variant	EKIRLRPGGKKKYQLKHi	40.8333	0.333333			2	0.0465116
546	400000	variant	EKIRLRPGGKKKYkLKHL	150.833	0.881917			6	0.139535
546	400000	variant	EKIRLRPGGKKRYKLKHI	7.5	0.333333			1	0.0232558
546	400000	variant optimal	RLRPGGKKKY	365.833	1.45297			42	0.976744
546	400000	variant optimal	PGGKKKYQL	7.5	0.333333			2	0.0465116
546	400000	variant optimal	PGGKKKYKL	0	0.333333			40	0.930233
546	400000	variant optimal	RPGGKKKYKL	4.16667	0.57735			40	0.930233
546	400000	variant optimal	RPGGKKKYQL	2.5	0.333333			2	0.0465116
546	400000	variant optimal	GGKKKYKL	3.33333	0.333333			40	0.930233
546	400000	variant optimal	GGKKKYQL	4.16667	0			2	0.0465116
546	400000	variant optimal	GGKKKYKLK	10.8333	0.333333			40	0.930233
546	400000	variant optimal	GGKKKYQLK	12.5	0.333333			2	0.0465116
546	400000	variant optimal	RPGGKKRYKL	4.16667	0.57735			1	0.0232558
546	400000	variant optimal	PGGKKRYKL	1.66667	0			1	0.0232558
546	400000	variant optimal	GGKKRYKLK	2.5	0.333333			1	0.0232558
546	400000	variant	LTFGWCFKLVPVEPEKIE	54.1667	0.57735	no escape	0	40	0.909091
546	400000	variant/ Clade B	LTFGWCFKLVPVEPEKVE	51.6667	0.57735			1	0.0227273
546	400000	variant	LTFGWCFKLVPVDPEKIE	40.8333	0.333333			3	0.0681818
546	400000	variant optimal	LTFGWCFKL	302.5	2.66667	optimal		34	0.772727
546	400000	variant optimal	LVPVDPEKI	9.16667	0			31	0.704545
546	400000	variant optimal	LVPVDPDKI	11.6667	0.333333			3	0.0681818
673	400000	variant/ Clade B	QVPLRPMTYKGALDLSHF	432.913		no escape	0	primer ID sequencing
673	400000	variant	QVPLRPMTYKAALDLSHF	265.413
673	400000	variant	VKTIHTDNGSNFISTTVK	753.333	6.06447	escape	1
673	400000	Clade B/ variant	VKTIHTDNGSNFTSTTVK	714.167	4.40959
673	400000	variant	VKTIHTDNGRNFTSTTVK	34.1667	0.333333
673	400000	variant	VKTIHTDNGGNFTSTTVK	57.5	0.57735
673	400000	variant optimal	HTDNGSNF	740	5.56776
673	400000	variant optimal	HTDNGRNF	85	0.57735
673	400000	variant optimal	HTDNGGNF	356.667	2.33333
673	400000	Clade B	LTFGWCFKLVPVEPEKVE	411.25	0.67	escape	1
673	400000	Variant	LTFGWCFKLVPVDPDKVE	8.75	0.33
673	400000	Clade B	NLLQYWSQELKNSAVSLL	80	0.58	escape	1
673	400000	Variant	NLLQYWSQELKKSAISLF	11.25	0.33					100
674	200000	Clade B	RAILHIPRRIRQGLERAL	1367.92	0	escape	1	N/A	0
674	200000	variant	RAilHIPrRIRQGLERsL	1231.25	3.84419			1	0.0714286
674	200000	variant	RAFlHIPrRIRQGLERSL	1526.25	3.4801			3	0.214286
674	200000	variant	RAFlHIPrRIRQGLERIL	1504.58	2.02759			3	0.214286
674	200000	variant	RAilHIPTRIRQGLERsL	67.0833	0.881917			1	0.0714286
674	200000	variant	RAiRHIPrRIRQGLERsL	1339.58	4.8074			6	0.428571
674	200000	variant optimal	IRQGLERsL	72.0833	1.45297			11	0.785714
674	200000	variant optimal	IRQGLERIL	76.25	1.85592			3	0.214286
674	200000	variant optimal	IPrRIRQGL	1586.25	3.84419	optimal		13	0.928571
674	200000	variant optimal	RIRQGLERS	46.25	1.45297			11	0.785714
674	200000	variant optimal	RIRQGLERI	35.4167	0.57735			3	0.214286
674	200000	variant/Clade B	HFLKEKGGLeGLIYSQKR	888.75	4.17665		1	13	0.928571
674	200000	variant	HFLKEKGGLDGLIYSQKR	317.917	2.88675	escape		1	0.0714286
674	200000	optimal	KEKGGLeGL	1001.25	5.20683	optimal		13	0.928571
674	200000	optimal	KEKGGLDGL	142.917	1			1	0.0714286
674	200000	variant optimal	FLKEKGGL	197.083	0.881917			14	1
674	400000	variant/Clade B	AIFQSSMTKILEPFRKQN	867.917	5.84047		0	13	0.928571
674	400000	variant	AIFQASMTKILEPFRKQN	828.75	1.52753	no escape		1	0.0714286
674	400000	variant optimal	AIFQSSMTK	488.75	3.60555			13	0.928571
674	400000	variant optimal	AIFQASMTK	619.583	5.48736			1	0.0714286
674	400000	Clade B	GPQREPYNEWTLELLEEL	250.417	0.88	no escape	0	N/A
674	400000	Variant	GPPREPYNEWTLELLEDL	244.583	4.06			14	1
674	200000	variant/ Clade B	EVGFPVRPQVPLRPMtYK	403.75	2.72845	escape	1	12	0.857143
674	200000	variant	EVGFPVRPQVPLRPMSYK	535.417	2.08167			1	0.0714286
674	200000	variant	EVGFPVRPQVPLRPMNYK	825.417	8.18535			1	0.0714286
674	200000	variant optimal	VPLRPMtY	42.0833	0.333333			12	0.857143
674	200000	variant optimal	VPLRPMSYK	78.75	0.666667			1	0.0714286
674	200000	variant optimal	VPLRPMNYK	65.4167	0.57735			1	0.0714286
720	400000	Clade B	KQLTEAVQKIATESIVIW	533.333	1.76383		1	N/A
720	400000	variant	RQLAEAVQKIsTEsIvIW	509.167	3.51188			27	0.658537
720	400000	variant	RQLAEAVQKIATEsIvIW	561.667	2.51661			6	0.146341
720	400000	variant	RQLAEAVQKIATEGIvIW	355.833	2.02759			3	0.0731707
720	400000	variant	RQLAEAVQKIATEGIIIW	192.5	2.18581	escape		2	0.0487805
720	400000	variant	RQLAEAVQKIATESIVLW	477.5	2.60342			1	0.0243902
720	400000	variant	RQLAEAVQKIVTESIVIW	415.833	2.848			1	0.02
720	400000	variant	RQLAEAVQKITTESIVIW	422.5	1.20185			1	0.02
720	400000	variant optimal	ISTESIVIW	450.833	2.33333			27	0.658537
720	400000	variant optimal	IATESIVIW	532.5	1.45297	optimal		6	0.146341
720	400000	variant optimal	IATEGIIIW	145.833	0.666667			2	0.0487805
720	400000	variant optimal	IATEGIVIW	368.333	3.1798			4	0.097561
720	400000	variant optimal	AEAVQKIST	6.66667	0			27	0.658537
720	400000	variant optimal	AEAVQKIAT	7.5	0.333333			12	0.292683
720	200000	Clade B	RAILHIPRRIRQGLERAL	239.167	3	no escape	0	N/A	0
720	200000	variant	RAVLHIPRRIRQGFERAL	201.667	0.5			17	0.404762
720	200000	variant	RAILHIPRRIRQGFERAL	191.667	1.5			14	0.333333
720	200000	variant	RALLHIPRRIRQGFERAL	136.667	1.5			4	0.0952381
720	200000	variant	RAFLHIPRRIRQGFERAL	129.167	1			6	0.142857
720	200000	variant	RAILHIPTRIRQGLERAL	126.667	0.5			1	0.0238095
720	200000	optimal variant	IPRRIRQGFA	256.667	1.5	optimal		41	0.97619
720	200000	optimal variant	IPRRIRQGLA	146.667	1.5			1	0.0238095
720	200000	Clade B	QNPDIVIYQYMDDLYVGS	153.333	1.76383		1	N/A	0
720	200000	variant	QNPDLVIYQYMDDLYVGS	235	3.05505			40	0.97561
720	200000	variant	QNPDLVIYQYMDDLNVGS	30	0			1	0.0243902
720	200000	variant	QNPDLVIYQYMDDLNVGS	35	0.57735	escape		1	0.0243902
720	200000	variant optimal	VIYQYMDDL	46.6667	0.666667			41	1
720	200000	variant optimal	YQYMDDLYV	70	0.57735			17	0.414634
720	200000	variant optimal	YQYMDDLNV	60	0			1	0.0243902
720	200000	Clade B	ELKNEAVRHFPRIWLHGL	36.6667	0.57735	no escape	0	N/A	0
720	200000	variant	ELKSEAVRHFPRIWLHgL	30	0.333333			32	0.761905
720	200000	variant	ELKSEAVRHFPRIWLHSL	46.6667	0.333333			9	0.214286
720	200000	variant	ELKSEAVRHFPRIWFHSL	33.3333	0.881917			1	0.0238095
720	200000	variant optimal	FPRIWFHSL	46.6667	0.57735			1	0.0238095
720	200000	variant optimal	FPRIWLHGL	30	1.20185			32	0.761905
720	200000	variant optimal	FPRIWLHSL	68.3333	1.3	optimal		3	0.0714286
720	200000	Clade B/ variant	TENFNMWkNNMVEQMHED	66.6667	0.5	escape	1	35	0.833333
720	200000	variant	TENFNMWTNNMVEQMHED	111.667	0.5			1	0.0238095
720	200000	variant	TENFNMWQNNMVEQMHED	111.667	0.5			2	0.047619
720	200000	variant	TENFNMWKSNMVEQMHED	141.667	1.5			1	0.0238095
720	200000	variant	TEKFNMWKNNMVEQMHED	169.167	0			1	0.0238095
720	200000	variant	TENFTMWKNNMVEQMHED	129.167	0			2	0.047619
720	200000	Clade B	IVFNQSSGGDPEIVMHSF	89.1667	1	escape	1	0	0
720	200000	variant	ITFNHSSGGDPEIIMhTF	114.167	0			40	0.952381
720	200000	variant	ITFNHSSGGDPEIIMYTF	39.1667	1			1	0.0238095
720	200000	variant	ITFTHSSGGDPEIIMHTF	131.667	0.5			1	0.0238095
720	200000	variant optimal	GGDPEIIMH	174.167	1			41	0.97619
720	200000	variant optimal	GGDPEIIMY	146.667	1.5			1	0.0238095
720	200000	Clade B/ variant	GPQREPYNEWTLELLEEL	116.667	1.20185	no escape	0	39	0.93
720	200000	variant	RPQREPYNEWTLELLEEL	170	7.54983			2	0.05
720	200000	variant	GSQREPYNEWTLELLEEL	190	8			1	0.02
720	200000	Clade B	MICSAAEKLWVTVYYGVP	202.5	0.408248	no escape	0	N/A	0
720	200000	variant	MICSATERLWVTIYYGVP	185	0			39	0.928571
720	200000	variant	MICSATEKLWVTIYYGVP	145	0			3	0.0714286
720	200000	Clade B	VPVWKEATTTLFCASDAK	144.167	1	escape	1	N/A	0
720	200000	variant	VPVWKEANaTLFCASDAK	64.1667	1			40	0.952381
720	200000	variant	VPVWKEANTTLFCASDAK	14.1667	0			2	0.047619
720	200000	variant optimal	VWKEANATL	114.167	2.1			40	0.952381
720	200000	variant optimal	VWKEANTTL	59.1667	0.816497			2	0.047619
720	200000	variant optimal	WKEANATLF	94.1667	2.3			40	0.952381
720	400000	Clade B	IVFIEYRKILRQRKIDRL	20	0.33		1	N/A	0
720	400000	Variant	FVLIEYRKILRQRKIDRL	4.17	0			41	1
720	200000	Clade B	ESPAVLESGTKE	196.667	0.5	escape	1	N/A	0
720	200000	variant	ESPAVLdSGAKE	81.6667	0.5			40	0.952381
720	200000	variant	ESPAVLYSGAKE	106.667	0.5			1	0.0238095
720	200000	new variant	ESPAVLdSGTKE	99.1667	0			1	0.0238095
720	200000	Clade B/variant	QGTVSFSFPQITLWQRPL	154.167	1	no escape	0	4	0.097561
720	200000	variant	QGTISlsfPQITLWQRPL	204.167	1			20	0.487805
720	200000	variant	QGTISFsLPQITLWQRPL	164.167	0			9	0.219512
720	200000	variant	QGTISFNfPQITLWQRPL	129.167	0			4	0.097561
720	200000	variant	QGTISSsfPQITLWQRPL	194.167	0			4	0.097561
720	200000	variant optimal	LSFPQITLW	329.167	0	optimal		20	0.487805
720	200000	variant optimal	FSLPQITLW	159.167	1			9	0.219512
720	200000	variant optimal	FNFPQITLW	231.667	1.5			4	0.097561
720	200000	variant optimal	SSFPQITLW	166.667	2.5			14	0.341463
720	200000	variant optimal	QITLWQRPL	139.167	1			31	0.756098
720	200000	stripe	NNTLKhIVEKLRKQYGS	20	0	escape		19	0.463415
720	200000	stripe	NNTLKQIVEKLRKQYGS	5	0		1	23	0.547619
720	200000	stripe	LERHGAVTSSNTAANNA	154.167	1	no escape		19	0.452381
720	200000	stripe	LERHGAiTSSNTAANNA	144.167	1		0	23	0.547619
720	200000	stripe	IINRWQgVGKAMYAPPI	96.6667	2.5	no escape		23	0.547619
720	200000	stripe	IINRWQEVGKAMYAPPI	116.667	1.5		0	19	0.452381
728	400000	Clade B	TINEEAAEWDRLHPVHAG	327.083	2.19	no escape	0	N/A	0
728	400000	Variant	TINEEAAEWDRLHPPQAG	327.917	2.52			59	1
728	400000	Clade B	EREVLVWKFDSRLAFHHM	554.167	6.11919	no escape	0	N/A	0
728	400000	variant	DKEVLVWKFDSHLAFRHM	469.167	11.1405			44	0.75
728	400000	variant	DKEVLMWKFDSHLAFRHM	354.167	2.66667			7	0.12
728	400000	variant	DKEVLEWKFDSHLAFRHM	350	3.66667			4	0.07
728	400000	variant	DREVLVWKFDSHLAFRHM	369.167	2.72845			4	0.07
728	400000	Clade B	EKIRLRPGGKKKYKLKHI	364.375	2.08167	no escape	0	0	0
728	400000	variant	EKIRLRPGGKKkYRLKHI	417.708	1.20185			56	0.949153
728	400000	variant	EKIRLRPGGKKRYRLKHI	229.375	0.57735			3	0.0508475
728	400000	optimal	KIRLRPGGK	154.375	1.1547			59	1
728	400000	optimal	RLRPGGKKk	367.708	5.20683			56	0.949153
728	400000	optimal	RLRPGGKKR	341.042	3.1798			3	0.0508475
728	400000	optimal	RPGGKKKYR	54.375	0.57735			56	0.949153
728	400000	optimal	RPGGKKRYR	61.875	1			3	0.0508475
728	400000	Clade B	HFLKEKGGLEGLIYSQKR	90.42	1	no escape	0	N/A	0
728	400000	Variant	HFLKEKGGLEGLIYSKQR	76.25	1.76			59	1
728	400000	Clade B	RERMRRAEPAADGVGAVS	64.375	1.52753		0	N/A	0
728	400000	variant	RERMRRTEPAADGVGAAS	61.875	1.52753			57	0.966102
728	400000	variant	KERMRRTEPAADGVGAAS	81.0417	0.333333			2	0.0338983
728	400000	variant optimal	EPAADGVGA	50.2083	0.333333			59	1
728	400000	variant optimal	RMRRTEPAA	71.875	1.1547			59	1
728	400000	Clade B optimal	RMRRAEPAA	30.2083	1.20185			N/A	0
749	200000	Clade B	NSDIKVVPRRKAKIIRDY	251.67	0.88	no escape	0	N/A	0
749	200000	Variant	NSEIKVVPRRKAKIIRDY	250	1.86			50	1
749	200000	Clade B	QKQITKIQNFRVYYRDSR	215.833	0.333333	escape	1	N/A	0
749	200000	variant	QKQISKIQNFRVYYRDNR	205.833	1.66667			48	0.96
749	200000	variant	QKQISKIRNFRVYYRDNR	45.8333	0.333333			2	0.04
749	200000	variant optimal	SKIQNFRVYY	344.167	1.33333	optimal		48	0.96
749	200000	variant optimal	SKIRNFRVYY	112.5	0.57735			2	0.04
749	200000	Clade B	IVQLNESVEINCTRPNNN	19.1667	0.333333	escape	1	N/A	0
749	200000	variant	IIQLNETIEINCTRLNNN	10.8333	0.333333			48	0.96
749	200000	variant	IIQLNETIEINCARLNNN	8	0			2	0.04
749	200000	variant optimal	ETIEINCAR	0.833333	0.333333			48	0.96
749	200000	variant optimal	ETIEINCTR	20.8333	0.333333	optimal		2	0.04
749	200000	Clade B	RKAKGWFYRHHYESTHPR	42.5	0	escape	1	N/A	0
749	200000	variant	KKCkGWFYRHHYESPHPK	52.5	0			31	0.62
749	200000	vairant	KKCNGWFYRHHYESPHPK	28	0.333333			11	0.22
749	200000	variant	KKCKGWSYRHHYESPHPK	26	0			7	0.14
749	200000	variant	KKCKGWIYRHHYESPHPK	40.8333	0.333333			1	0.02
749	200000	variant optimal	SKKCKGWFY	132.5	1	optimal		31	0.62
749	200000	variant optimal	SKKCKGWSY	20.8333	0.333333			7	0.14
749	200000	variant optimal	SKKCKGWIY	89.1667	0.333333			1	0.02
749	200000	variant optimal	SKKCNGWFY	24.1667	0.333333			11	0.22
773	200000	Clade B	VPLDKDFRKYTAFTIPSI	1455.83	0.881917	no escape	0	N/A	0
773	200000	Variant	VPLDKEFRKYTAFTIPSI	1450.83	4.66667			9	1
773	200000	Clade B	ELKNEAVRHFPRIWLHGL	759.167	1.73205	no escape	0	N/A	0
773	200000	Variant	ELKREAVRHFPRIWLHNL	649.167	2.64575			9	1
773	200000	Clade B	EELRSLYNTVATLYCVHQ	92.5	0.333333	no escape	0	N/A	0
773	200000	Variant	EELKSVYNTVATLYCVHQ	115.833	2.02759			9	1
833	400000	Clade B	FSPEVIPMFSALSEGATP	401.25	1.15	no escape	0	N/A	0
833	400000	Variant	FSPEVIPMFTALSEGATP	399.58	0.88			3	1
833	400000	Clade B	WLEAQEEEEVGFPVRPQV	73.7583	1.45297	no escape	0	N/A	0
833	400000	variant	WVEAQQEGEEVGFPVRPQV	77.925	2.08167			1	0.5
833	400000	variant	WVEAQQEGDEVGFPVRPQV	64.5917	0.881917			1	0.5
834	400000	Clade B	VPLDKDFRKYTAFTIPSI	1389.58	1.86	no escape	0	N/A	0
834	400000	Variant	VPLYEDFRKYTAFTIPSI	1418.75	2.33			32	1
834	400000	Clade B	VEAIIRILQQLLFIHFRI	100.42	0.58	no escape	0	N/A	0
834	400000	Variant	VEALIRILQQLLFIHFRI	127.92	1.15			32	1
834	400000	Clade B	IAGTTSTLQEQIGWMTNN	112.5	2.08167	escape	1	N/A	0
834	400000	seq consensus	IAGTTStLQEQINWMTSN	404.167	2.4037			27	0.931034
834	400000	variant	IAGTTSNLQEQINWMTSN	40	0.57735			2	0.0689655
834	400000	cons optimal	TStLQEQINW	420	2.08167	optimal		27	0.931034
834	400000	optimal	TSNLQEQINW	175.833	0.881917			2	0.0689655
834	400000	variant/Clade B	QKQITKIQnFRVYYRDSR	197.5	1.76383	escape	1	28	0.965517
834	400000	variant	QKQITKIQKFRVYYRDSR	17.5	0.881917			1	0.0344828
834	400000	variant optimal	KIQNFRVYY	216.667	2	optimal		28	0.965517
834	400000	variant optimal	KIQKFRVYY	24.1667	0.57735			1	0.0344828
848	400000	Clade B	HFLKEKGGLEGLIYSQKR	982.5	1.2	no escape	0	N/A	0
848	400000	Variant	HFLKEKGGLEGLVYSQQR	880.833	2.08			1	1
848	400000	Clade B	QKQITKIQNFRVYYRDSR	370	1.45	no escape	0	N/A	0
848	400000	Variant	QKQISKIQNFRVYYRDSR	374.17	1.76			1	1
848	400000	Clade B	WEVLKYWWNLLQYWSQEL	145.83	1	no escape	0	N/A	0
848	400000	Variant	WELLKYWWNLLQYWSQEL	186.67	1.45			1	1
870	400000	variant/Clade B	EVGFPVRPQVPLRPMTYK	552.499	6.17342	no escape	0	7	0.35
870	400000	variant	EVGFPVrPQVPLRPMTFK	380.832	4.16333			9	0.45
870	400000	variant	EVGFPVKPQVPLRPMTFK	403.332	2			1	0.05
870	400000	variant	EVGFPVKPQVPLRPMTYK	497.499	4.84195			3	0.15
870	400000	variant/Clade B	YKGALDLSHFLKEKGGLE	128.332	3.60555	no escape	0	10	0.5
870	400000	variant	FKGALDLSHFLKEKGGLE	115.832	0.816497			10	0.5
870	400000	Clade B	KILEPFRKQNPDIVIYQY	75.8333	2.3094	no escape	0	N/A	0
870	400000	variant	KILDPFRKQNPdiVIYQY	89.1667	1.20185			12	0.6
870	400000	variant	KILDPFRKQNPEiVIYQY	48.3333	1.1547			4	0.2
870	400000	variant	KILDPFRKQNPNiVIYQY	85.8333	1.1547			1	0.05
870	400000	variant	KILDPFRKQNPdVVIYQY	83.3333	1			3	0.15
870	400000	variant optimal	NPdiVIYQY	57.0833	1.22474			12	0.6
870	400000	variant optimal	NPEiVIYQY	61.6667	1.76383			4	0.2
870	400000	variant optimal	NPNiVIYQY	63.3333	1.63299			1	0.05
870	400000	variant optimal	NPdVVIYQY	80.8333	0			3	0.15
870	400000	variant/Clade B	RKKRRQRRRAPQDSQTHQ	20	0.57735	no escape	0	18	0.9
870	400000	consensus	RKKRRQRRRAPQDgQaHQ	21.6667	0.666667			1	0.05
870	400000	variant	RKKRRQRRRAPQGSQTHQ	21.6667	0.333333			1	0.05
879	400000	Clade B	PFRDYVDRFYKTLRAEQA	757.5	2.08	no escape	0	N/A	0
879	400000	Variant	PFRDYVDRFYKVLRAEQA	864.17	2.85			6	1
879	400000	Clade B	EKIRLRPGGKKKYKLKHI	40.83	0.88	no escape	0	N/A	0
879	400000	Variant	EKIRLRPGGKKQYKLKHI	22.5	0			6	1
879	200000	Clade B/variant	NLLQYWSQELKNSAvSLL	35.6667	0.272166	escape	1	1	0.166667
879	200000	variant	NLLQYWSQELKNSAASLL	0.666667	0.272166			5	0.833333
879	200000	variant optimal	SQELKNSAV	5.66667	0.272166			1	0.166667
879	200000	variant optimal	SQELKNSAA	10.6667	0.272166			5	0.833333
879	200000	variant optimal	ELKNSAVSL	14	0			1	0.166667
879	200000	variant optimal	ELKNSAASL	7.33333	0.272166			5	0.833333
879	200000	variant optimal	LKNSAVSLL	4	0.471405			1	0.166667
879	200000	variant optimal	LKNSAASLL	10.6667	0.272166			5	0.833333
926	400000	Clade B/variant	TPQDLNTMLNtVGGHQAA	134.583	0.333333	no escape	0	12	0.923077
926	400000	variant	TPQDLNTMLNIVGGHQAA	108.75	2			1	0.0769231
926	400000	variant optimal	TPQDLNTML	159.583	2.18581	optimal		13	1
926	400000	variant optimal	DLNTMLNIVG	56.25	0.57735			1	0.0769231
926	400000	variant optimal	DLNTMLNTVG	51.25	0.57735			12	0.923077
926	400000	Clade B	WRKKRYSTQVDPDLADQL	55.4167	0.58	no escape	0	N/A	0
926	400000	Variant	WRLRRYSTQIDPDLADQL	34.5833	0.67			13	1
926	400000	Clade B	VKHHMYISRKAKGWFYRH	33.75	0.33	no escape	0	N/A	0
926	400000	Variant	VKHHMYISKQAKDWLYRH	24.5833	0.33			13	1
926	400000	Clade B	QEQIGWMTNNPPIPVGEI	23.75	1.2	no escape	0	N/A	0
926	400000	Variant	QEQITWMTGNPPIPVGEI	25.4167	0.58			13	1
926	400000	Clade B	PTAPPEESFRFGEETTTP	34.5833	0.881917	no escape	0	N/A	0
926	400000	consensus	PTAPPAESgfGEEMaPSQ	32.9167	0.333333			9	0.692308
926	400000	variant	PTAPPAESRfGEEMaPSQ	30.4167	0.333333			1	0.0769231
926	400000	variant	PTAPPAESgLGEEMaPSQ	47.0833	1.76383			1	0.0769231
926	400000	variant	PTAPPAESgSGEEMaPSQ	53.75	1.52753			1	0.0769231
926	400000	variant	PTAPPAESgfGEEMTPSQ	54.5833	0.666667			1	0.0769231
926	400000	variant optimal	TAPPAESGF	72.9167	1.20185	optimal		10	0.769231
926	400000	variant optimal	TAPPAESRF	32.9167	0.333333			1	0.0769231
926	400000	variant optimal	TAPPAESGL	62.9167	0.881917			1	0.0769231
926	400000	variant optimal	TAPPAESGS	68.75	1.52753			1	0.0769231
929	400000	Clade B	NSDIKVVPRRKAKIIRDY	294.375	3.21455	escape	1	N/A	0
929	400000	variant	NSEIKVVPRRKvKIIkdY	103.542	1.45297			4	0.571429
929	400000	variant	NSEIKVVPRRKAKIIRNY	330.208	2.02759			1	0.142857
929	400000	variant	NSEIKVVPRRKvKIIRdY	232.708	1.20185			2	0.285714
929	400000	variant optimal	RKvKIIkdY	105.208	1.45297			4	0.571429
929	400000	variant optimal	RKAKIIRNY	410.208	2.18581	optimal		1	0.142857
929	400000	variant optimal	RKvKIIRdY	233.542	1.45297			2	0.285714
929	400000	Clade B optimal	RKAKIIRDY	351.042	0.333333			N/A	0
929	400000	Clade B	GRPAEPVPLQLPPLERLT	38.6667	0.272166	no escape	0	0	0
929	400000	variat	GRSAEPVPLhLPPLERLT	51.1667	2.32538			5	0.555556
929	400000	variant	GRSAEPVPLQLPPLERLT	33.6667	0.544331			4	0.444444
929	400000	optimal	SAEPVPLhL	-9.66667	0.544331			5	0.555556
929	400000	optimal	SAEPVPLQL	-25.5	0.471405			4	0.444444
929	400000	stripe	DLRNLCLFiYHRLRDLL	67.0417	0.881917	escape	1	5	0.555556
929	400000	stripe	DLRNLCLFSYHRLRDLL	135.208	2.02759			4	0.444444
929	400000	stripe	GPGTRyPLTFGWCFKLV	35.2083	0.666667		0	5	0.555556
929	400000	stripe	GPGTRFPLTFGWCFKLV	45.2083	0.333333			4	0.444444
929	400000	stripe	HIYLGRSAEPVPLQLPPLER	142.708	1.45297		0	4	0.444444
929	400000	stripe	HIYLGRSAEPVPLhLPPLER	154.375	1.1547			5	0.555556
929	400000	stripe	VRHFPRPWLHSLGQYIYETY	75.2083	0.333333		0	4	0.444444
929	400000	stripe	VRHFPRPWLHgLGQYIYETY	79.375	0.57735			5	0.555556
930	200000	Clade B	YKGALDLSHFLKEKGGLE	744.167	4.25572	escape	1	N/A	0
930	200000	variant	YKGAlDLSHFLrkeGGLE	269.167	1.85592			11	0.611111
930	200000	variant	YKGAlDLSHFLKEKGGLE	634.167	3.66667			4	0.222222
930	200000	variant	YKGAVDLSHFLKEKGGLE	182.5	1.52753			1	0.0555556
930	200000	variant	YKGAlDLSHFLrEKGGLE	472.5	2.51661			1	0.0555556
930	200000	variant	YKGAlDLSHFLrkKGGLE	354.167	1.20185			1	0.0555556
930	200000	variant optimal	KGALDLSHFLK	572.5	5.50757			4	0.222222
930	200000	variant optimal	KGAVDLSHFLK	32.5	0			1	0.0555556
930	200000	variant optimal	KGALDLSHFLR	384.167	0.881917			13	0.722222
930	200000	variant optimal	FLrkeGGL	15	0.5			11	0.611111
930	200000	variant optimal	FLKEKGGL	270	1.5			5	0.277778
930	200000	variant optimal	FLrEKGGL	139.167	0.408248			1	0.0555556
930	200000	variant optimal	FLrkKGGL	9.16667	0.408248			1	0.0555556
930	200000	Clade B	NNPPIPVGEIYKRWIILG	213.333	0.67	no escape	0	N/A	0
930	200000	Variant	HNPPIPVGEIYKRWIILG	201.667	1.86			18	1
930	200000	Clade B	LVPVEPEKVEEANEGENN	33.33	0.33	no escape	0	N/A	0
930	200000	Variant	LVPVEPEEVEKANEGENN	36.67	0.33			18	1
930	200000	Clade B	FDSRLAFHHMARELHPEY	1025.83	1.45297		1	N/A	0
930	200000	variant	FDSrLAFHHvAREkHPEF	1089.17	0.881917			14	0.777778
930	200000	variant	FDSHLAFHHvAREkHPEF	9.16667	0.333333	escape		1	0.0555556
930	200000	variant	FDSrLAFHHMAREkHPEF	685.833	1.76383			2	0.111111
930	200000	variant	FDSrLAFHHvAREMHPEF	1194.17	1.45297			1	0.0555556
930	200000	variant optimal	AFHHVAREk	4.16667	0.333333			15	0.833333
930	200000	variant optimal	AFHHMAREk	2.5	0.57735			2	0.111111
930	200000	variant optimal	AFHHVAREM	5.83333	0.333333			1	0.0555556
930	200000	variant optimal	vAREkHPEF	45.8333	0.333333			15	0.833333
930	200000	variant optimal	MAREkHPEF	24.1667	0.333333			2	0.111111
930	200000	variant optimal	vAREMHPEF	394.167	1.20185			1	0.0555556
930	200000	variant/Clade B	KLVSAGiRKVLFLDGIDK	241.25	2.16025	no escape	0	13	0.928571
930	200000	variant	KLVSAGVRKVLFLDGIDK	243.75	0.288675			1	0.0714286
930	200000	Clade B	HRTKIEELRQHLLRWGFT	55	0.58	no escape	0	N/A	0
930	200000	Variant	HRTKIEELRQHLLKWGLT	55	0			14	1
930	200000	Clade B	KRQDILDLWVYHTQGYFP	146.25	0		1	N/A	0
930	200000	variant	RRQEILDLWIYHTQGYFP	296.667	1.66667			1	0.0555556
930	200000	variant	KRQEILDLWvYHTQGYFP	220	2			6	0.333333
930	200000	variant	NRQEILDLWvYHTQGYFP	160	1.52753			3	0.166667
930	200000	variant	RRQEILDLWvYHTQGYFP	156.667	0.881917			7	0.388889
930	200000	variant	QRQEILDLWvYHTQGYFP	125	0.57735	escape		1	0.0555556
930	200000	variant optimal	RQEILDLWVY	216.667	0.333333			17	0.944444
930	200000	variant optimal	RQEILDLWIY	146.667	0.333333			1	0.0555556
930	200000	Clade B	GPQREPYNEWTLELLEEL	365.833	1.20185	escape	1	N/A	0
930	200000	variant	GSPREPYNEWALELLEEL	84.1667	0.333333			1	0.0555556
930	200000	variant	GpPREPYNEWtLELLEEL	324.167	0.881917			17	0.944444
930	200000	variant optimal	SPREPYNEW	0.833333	0.333333			1	0.0555556
930	200000	variant optimal	PPREPYNEW	-0.833333	0.333333			17	0.944444
930	200000	Clade B	EKIRLRPGGKKKYKLKHI	265	0.942809	no escape	0	N/A	0
930	200000	variant	EKIRLRPGGKKKYqLKHL	145	2.35702			9	0.642857
930	200000	variant	EKIRLRPGGKKKYKLKHL	255	2.62467			5	0.357143
930	200000	Clade B	VKTIHTDNGSNFTSTTVK	181.667	0.942809		1	N/A	0
930	200000	variant	VKTIHTDNGPNFISAaVK	5	0.57735	escape		9	0.642857
930	200000	variant	VKTIHTDNGPNFISATVK	5	0.57735	escape		5	0.357143
930	200000	variant optimal	TDNGPNFISAAVK	0	0			9	0.642857
930	200000	variant optimal	TDNGPNFISATVK	1.66667	0.333333			5	0.357143
930	200000	variant optimal	PNFISAAVK	5	0.57735			9	0.642857
930	200000	variant optimal	PNFISATVK	10	0.57735			5	0.357143
930	400000	Clade B	AIFQSSMTKILEPFRKQN	41.67	0.67	no escape	0	N/A	0
930	400000	Variant	AIFQSSMIKILEPFRKQN	38.33	0.33			14	1
930	200000	Clade B	KAGYVTDRGRQKVVSLTD	139.583		escape	1	N/A	0
930	200000	variant	KAGYVTNkGRqKvvtlTD	148.333	0.881917			7	0.5
930	200000	variant	KAGYVTNRGRqKIvSITD	135	0.57735			1	0.0714286
930	200000	variant	KAGYVTNRGRqKvvtITD	130	1			4	0.285714
930	200000	variant	KAGYVTNRGRqKvvtlTD	43.3333	0.333333			1	0.0714286
930	200000	variant	KAGYVTNkGRRKvvSlTD	28.3333	0.333333			1	0.0714286
930	200000	variant optimal	kGRqKvvtlT	10	0			7	0.5
930	200000	variant optimal	RGRqKIvSIT	13.3333	0.333333			1	0.0714286
930	200000	variant optimal	RGRqKvvtIT	13.3333	0.333333			4	0.285714
930	200000	variant optimal	RGRqKvvtlT	3.33333	0.666667			1	0.0714286
930	200000	variant optimal	kGRRKvvSlT	3.33333	0.666667			1	0.0714286
930	200000	Clade B	AEAMSQVTNSATIMMQRG	135.833	1.20185	escape	1	N/A	0
930	200000	variant	AEAMSQVTnPATvMmQRG	159.167	1.45297			7	0.5
930	200000	variant	AEAMSQVTSPATIMmQRG	0.833333	0.333333			2	0.142857
930	200000	variant	AEAMSQVTnPATIMIQRG	125.833	0.881917			2	0.142857
930	200000	variant	AEAMSQVTnPATIMVQRG	102.5	1			1	0.0714286
930	200000	variant	AEAMSQVTnPATvMIQRG	105.833	0.333333			2	0.142857
930	200000	variant optimal	SQVTnPATvM	39.1667	0.333333			9	0.642857
930	200000	variant optimal	SQVTSPATIM	10.8333	0.333333			2	0.142857
930	200000	variant optimal	SQVTnPATIM	124.167	1.33333			3	0.214286
930	200000	variant optimal	TSPATIMmQR	130.833	1.85592			2	0.142857
930	200000	variant optimal	TNPATVMMQR	120.833	0.333333			7	0.5
930	200000	variant optimal	TNPATIMIQR	57.5	0.57735			2	0.142857
930	200000	variant optimal	TNPATIMVQR	15.8333	0.333333			1	0.0714286
930	200000	variant optimal	TNPATVMIQR	14.1667	0.666667			2	0.142857
930	200000	Clade B	RIRQGLERALL	86.25	0.471405	no escape	0	N/A	0
930	200000	consensus	RIRQGlEgALl	76.25	0.471405			12	0.666667
930	200000	variant	RIRQGFEgALl	82.9167	0.272166			3	0.166667
930	200000	variant	RIRQGlESALl	67.9167	0.272166			1	0.0555556
930	200000	variant	RIRQGlEVALl	64.5833	0.272166			1	0.0555556
930	200000	variant	RIRQGlERALI	92.9167	0.720082			1	0.0555556
930	200000	Clade B	RERMRRAEPAADGVGAVS	44.5833	0.272166	no escape	0	N/A	0
930	200000	variant	RERMRRAEPAAEPAAEGV	57.9167	0.544331			16	0.888889
930	200000	variant	REGMRrAEPAAEPAAEGV	36.25	0			1	0.0555556
930	200000	variant	RERMRQAEPAAEPAAEGV	36.25	0			1	0.0555556
937	400000	variant/Clade B	KKKSVTVLDVGDAYFSVP	390.417	1.44016	no escape	0	14	0.777778
937	400000	variant	KKKSITVLDVGDAYFSVP	400.417	3.47478			2	0.111111
937	400000	variant	KKKSVTILDVGDAYFSVP	394.583	1.88562			2	0.111111
937	400000	Clade B	PGPGIRYPLTFGWCFKLV	187.917	1.96261	no escape	0	N/A	0
937	400000	variant	PGPGTRFPLTFGWCFKLV	144.583	2.94392			18	0.9
937	400000	variant	PGPGPRYPLTFGWCFKLV	150.833	2.47487			1	0.05
937	400000	variant	PGPGTRYPLTFGWCFKLV	155.417	1.36083			1	0.05
937	400000	Clade B	HMARELHPEYYKDC	55	0.58	escape	1	N/A	0
937	400000	Variant	HKARMLHPEFYKDC	16.67	0.33			18	1
937	400000	Clade B	IKKEKVYLAWVPAHKGIG	75.3333	0.666667	escape	1	N/A	0
937	400000	variant	IKKEKVYLTWVPAHKGIG	142	0.333333			17	0.944444
937	400000	variant	ITKEKVYLTWVPAHKGIG	65.3333	1.76383			1	0.0555556
937	400000	variant optimal	KVYLTWVPA	44.5	0			18	1
937	400000	variant optimal	VYLTWVPAH	-1.33333	0.333333			18	1
937	400000	variant optimal	IKKEKVYLT	11.1667	0.333333			17	0.944444
937	400000	variant optimal	ITKEKVYLT	7	0.57735			1	0.0555556
937	400000	Clade B	KGLGISYGRKKRRQRRRA	56.1667	0.881917	escape	1	0	0
937	400000	variant	KGLGISYGRKKRRQRRRS	21.1667	0.333333			1	0.05
937	400000	variant	KGLGISYGRKKRRQRRGS	68.6667	1.20185			19	0.95
937	400000	variant optimal	GLGISYGRK	26.1667	0.333333			20	1
937	400000	variant optimal	GISYGRKKR	33.6667	0.333333			20	1
937	400000	variant optimal	ISYGRKKRR	57	1			20	1
937	400000	variant optimal	SYGRKKRRQ	91.1667	1.45297			20	1
1014	400000	Clade B	RAILHIPRRIRQGLERAL	541.042	2.32538	no escape	0	N/A	0
1014	400000	variant	RAvLhIPrRIRQGFERAL	737.708	3.03071			48	0.676056
1014	400000	variant	RAILNIPTRIRQGFERAL	391.875	5.35413			23	0.323944
1014	400000	Clade B	HFLKEKGGLEGLIYSQKR	382.708	5.8563		1	N/A	0
1014	400000	variant	HFLKEKGGLDGiIYSRKR	715.208	3.60041			44	0.619718
1014	400000	variant	HFLKEKGGLDGLIYSRKR	1168.54	0.981307			26	0.366197
1014	400000	variant	HFLKDKGGLDGLIYSRKR	71.0417	1.78471	escape		1	0.0140845
1014	400000	variant/Clade B	PGHKARVLAEAMSQVTNS	92.7083	2.76218	no escape	0	64	0.969697
1014	400000	variant	PGHKARILAEAMSQVTNS	89.375	0.816497			2	0.030303
1014	400000	Clade B	PGPGIRYPLTFGWCFKLV	103.542	1.51535	escape	1	0	0
1014	400000	variant	PGPGVRfPLTFGWCfKLV	505.208	1.18634			65	0.915493
1014	400000	variant	PGPGTRfPLTFGWCfKLV	680.208	5.89413			2	0.028169
1014	400000	variant	PGPGVRYPLTFGWCYKLV	106.875	2.94392			4	0.056338
1014	400000	Clade B	AKRRVVQREKRAVGIGAM	27.5	1.15	escape	1	N/A	0
1014	400000	Variant	AKRRVVQREKRAVGLGAV	71.67	1.45			71	1
1014	400000	stripe	EVIPAETGQETAYFLLK	7.08333	0	escape	1	28	0.424242
1014	400000	stripe	EVIPAETGQETAYFiLK	72.9167	0.881917			38	0.575758
1014	400000	stripe	RWPVTTvHTDNGSNFTS	18.75	0.666667	no escape	0	40	0.606061
1014	400000	stripe	RWPVTTIHTDNGSNFTS	16.25	0.333333			26	0.393939
1086	200000	Clade B	EKIRLRPGGKKKYKLKHI	162.083	4.58258	escape	1	N/A	0
1086	200000	variant	ErIRLRPGGKKkYKLKHI	145	0			15	0.714286
1086	200000	variant	EGIRLRPGGKKkYKLKHI	130	2.4037			3	0.142857
1086	200000	variant	ErIRLRPGGKKQYKLKHI	13.3333	0.333333			2	0.0952381
1086	200000	variant	ErIRLRPGGKKRYKLKHI	118.333	0.881917			1	0.047619
1086	200000	variant optimal	rIRLRPGGK	46.6667	0			18	0.857143
1086	200000	variant optimal	GIRLRPGGK	55	0.333333			3	0.142857
1086	200000	variant optimal	RLRPGGKK	126.667	1			21	1
1086	200000	variant optimal	RLRPGGKKk	201.667	1.52753	optimal		18	0.857143
1086	200000	variant optimal	RLRPGGKKQ	20	0.333333			2	0.0952381
1086	200000	variant optimal	RLRPGGKKR	158.333	0.333333			1	0.047619
1086	200000	variant optimal	RPGGKKkYKL	5	0.333333			18	0.857143
1086	200000	variant optimal	RPGGKKQYKL	5	0.666667			2	0.0952381
1086	200000	variant optimal	RPGGKKRYKL	3.33333	0.333333			1	0.047619
1095	400000	variant/Clade B	AIFQSSMtKILEPFRKQN	1946.25	0	no escape	0	32	0.914286
1095	400000	variant	AIFQSSMIKILEPFRKQN	1717.92	2.17732			3	0.0857143
1095	400000	variant optimal	AIFQSSMtK	2027.08	2.84149	optimal		32	0.914286
1095	400000	variant optimal	AIFQSSMIK	1832.92	1.90516			3	0.0857143
1095	400000	variant optimal	MtKILEPFR	34.5833	0.272166			32	0.914286
1095	400000	variant optimal	MIKILEPFR	12.9167	0.272166			3	0.0857143
1095	400000	Clade B	KEGHIAKNCRAPRKKGCW	466.25	0.57735	escape	1	N/A	0
1095	400000	variant	REGHIAKNCrAPRKkGCW	369.583	1.08866			21	0.6
1095	400000	variant	REGHIAKNCKAPRKkGCW	380	2.12568			8	0.228571
1095	400000	variant	REGHIAKNCrAPRKRGCW	232	0.720082			6	0.171429
1095	400000	variant optimal	EGHIAKNCR	24.5833	0.720082			27	0.771429
1095	400000	variant optimal	EGHIAKNCK	12.9167	0.272166			8	0.228571
1095	400000	variant optimal	IAKNCrAPR	42.0833	0.544331			27	0.771429
1095	400000	variant optimal	IAKNCKAPR	30.4167	0.272166			8	0.228571
1095	400000	Clade B	HRTKIEELRQHLLRWGFT	192.917	1.18634	escape	1	N/A	0
1095	400000	variant	HRaKIEELRQHLLkWGFT	65.4167	0.544331			11	0.314286
1095	400000	variant	HRIKIEELRQHLLkWGFT	61.25	0.816497			6	0.171429
1095	400000	variant	HRIKIEELRQHLLRWGFT	132.083	0.272166			2	0.0571429
1095	400000	variant	HRaKIEKLRQHLLkWGFT	17.0833	0.272166			1	0.0285714
1095	400000	variant	HRaKIEELRQHLLRWGFT	100.417	0.272166			15	0.428571
1095	400000	variant optimal	AKIEELRQHLL	22.9167	0.272166			26	0.742857
1095	400000	variant optimal	IKIEELRQHLL	70.4167	0.272166			8	0.228571
1095	400000	variant optimal	aKIEKLRQHLL	10.4167	0.272166			1	0.0285714
10430	400000	Clade B	LEGLIYSQKRQDILDLWV	238.542	2.76218	escape	1	N/A	0
10430	400000	variant	LEGliYSQkRqeILDLWV	357.083	3.28295			16	0.533333
10430	400000	variant	LEGIiYSQRReDILDLWV	279.375	1.63299			1	0.0333333
10430	400000	variant	LEGlVYSQkRqeILDLWV	412.917	2.33333			2	0.0666667
10430	400000	variant	LEGlTYSQkRqDILDLWV	323.75	1			2	0.0666667
10430	400000	variant	LEGliYSQkRReILDLWV	13.75	0			1	0.0333333
10430	400000	variant	LEGlTYSQkRqeILDLWV	317.917	1.33333			3	0.1
10430	400000	variant	LEGlTYSQkRRDILDLWV	27.9167	0.333333			5	0.166667
10430	400000	variant optimal	iYSQkRqeI	0.416667	0.333333			16	0.533333
10430	400000	variant optimal	iYSQRReDI	1.25	0.57735			1	0.0333333
10430	400000	variant optimal	VYSQkRqeI	60.4167	0.333333			2	0.0666667
10430	400000	variant optimal	TYSQkRqDI	57.0833	0.333333			2	0.0666667
10430	400000	variant optimal	iYSQkRReI	22.9167	0.333333			1	0.0333333
10430	400000	variant optimal	TYSQkRqeI	23.75	0			2	0.0666667
10430	400000	variant optimal	TYSQkRRDI	25.4167	0.666667			5	0.166667
10430	400000	variant optimal	RqeILDLWV	471.25	2.51661	optimal		21	0.7
10430	400000	variant optimal	ReDILDLWV	308.75	0.57735			1	0.0333333
10430	400000	variant optimal	RqDILDLWV	314.583	1.85592			2	0.0666667
10430	400000	variant optimal	RReILDLWV	67.0833	0.881917			1	0.0333333
10430	400000	variant optimal	RRDILDLWV	24.5833	0.333333			5	0.166667
